# Supplementary material
Source: PubMed Central journal article supplement (PMC9294771)
Supplement: 11517_2022_2619_MOESM1_ESM.pdf [file 11517_2022_2619_MOESM1_ESM.pdf]

## Supplementary Material

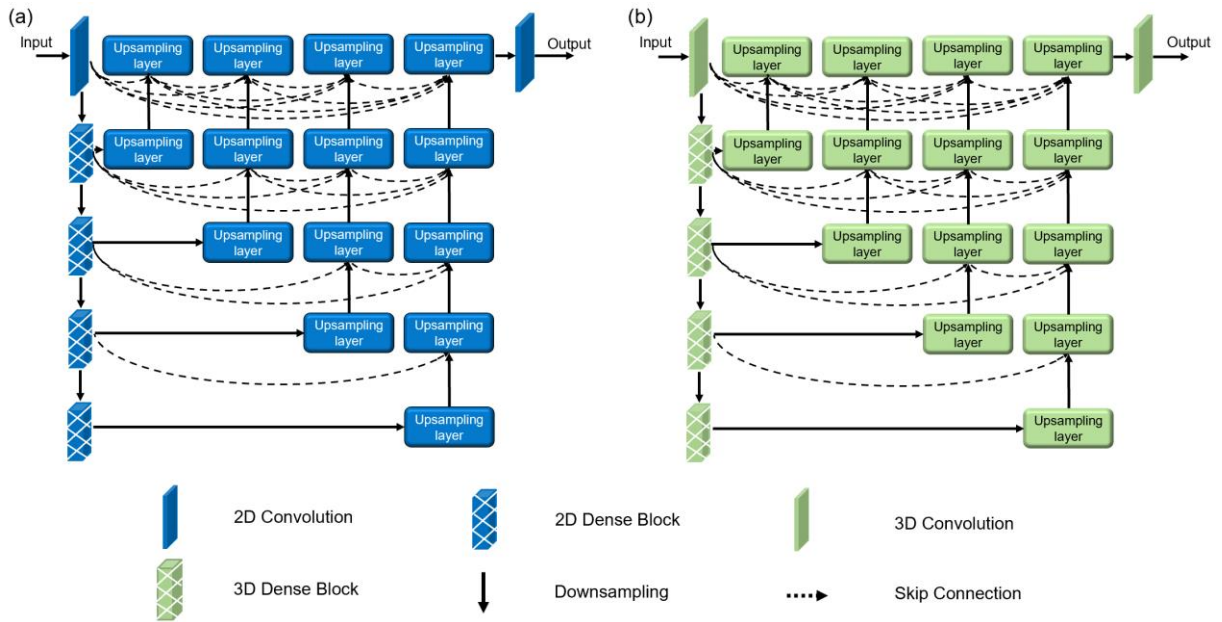

**Supplementary Fig. 1.** The detailed architecture of the 2D network (a) and 3D network (b) in our proposed TSH-UNet.

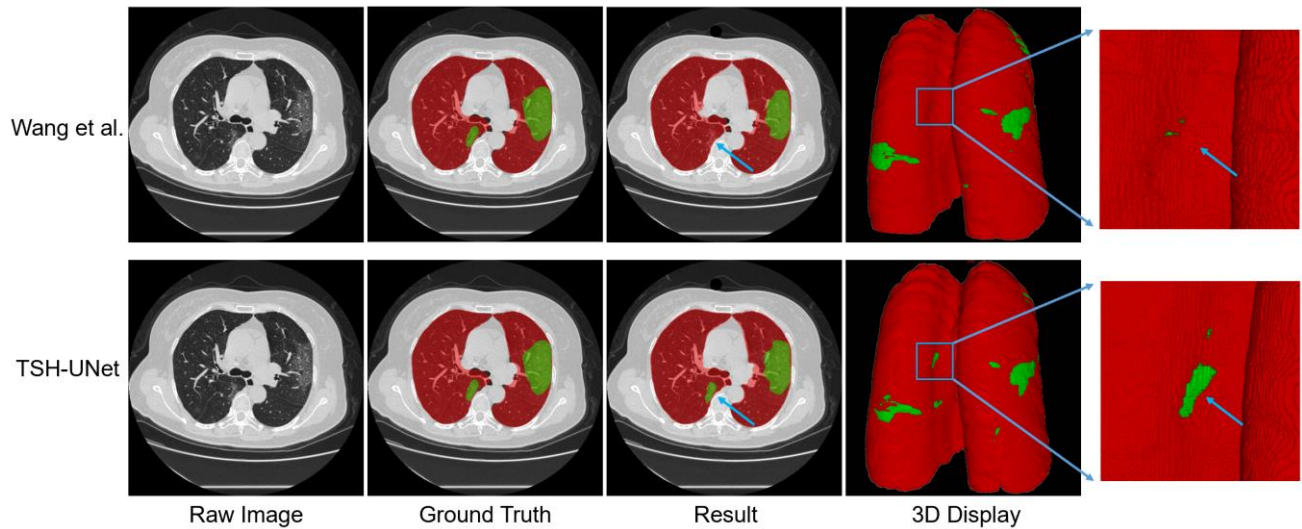

**Supplementary Fig. 2.** The 3D display of the results of Wang et al. (2D UNet++) and our TSH-UNet. The first row is the result of Wang et al. and the second row is the result of our TSH-UNet. The first three columns are a representative slice, its corresponding ground truth, and its corresponding result respectively. The fourth column is the 3D display of a representative case. In the blue frame is the small lesion that cannot be segmented by Wang et al. but can be correctly segmented by our TSH-UNet.

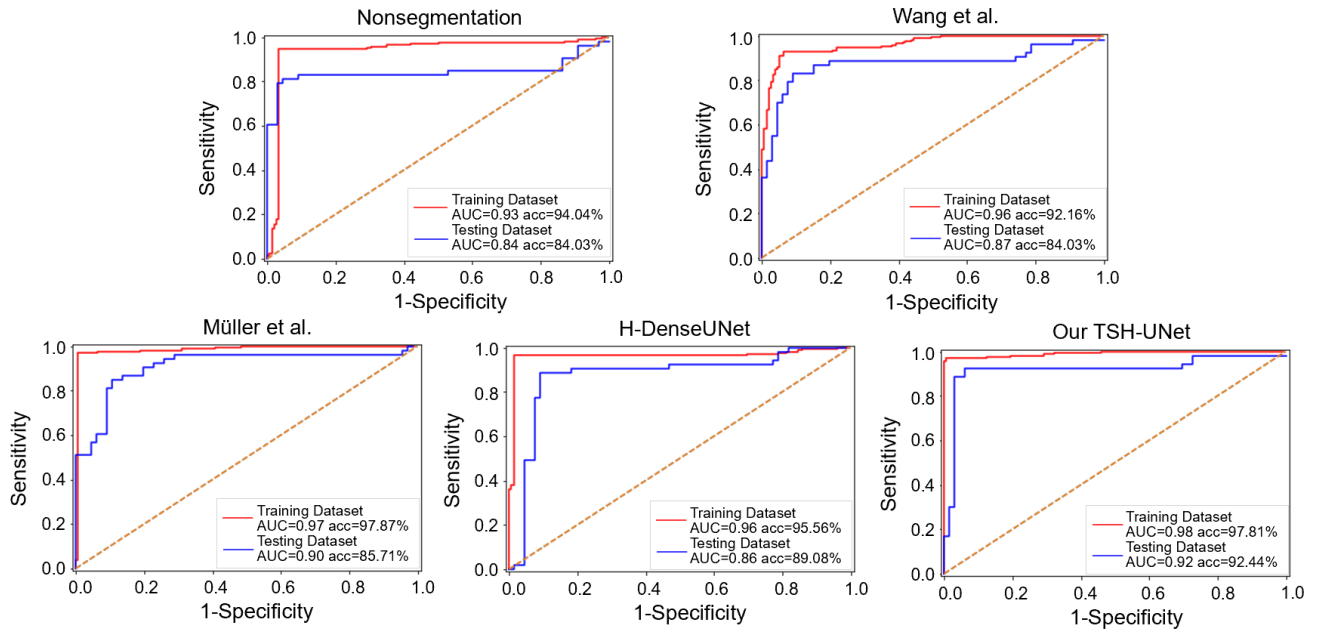

**Supplementary Fig. 3.** ROC curves of classification tasks using the results of different segmentation networks. Each subgraph represents a segmentation network. In each subgraph, the red curve represents the results on the training dataset, while the blue one represents the results on the test dataset

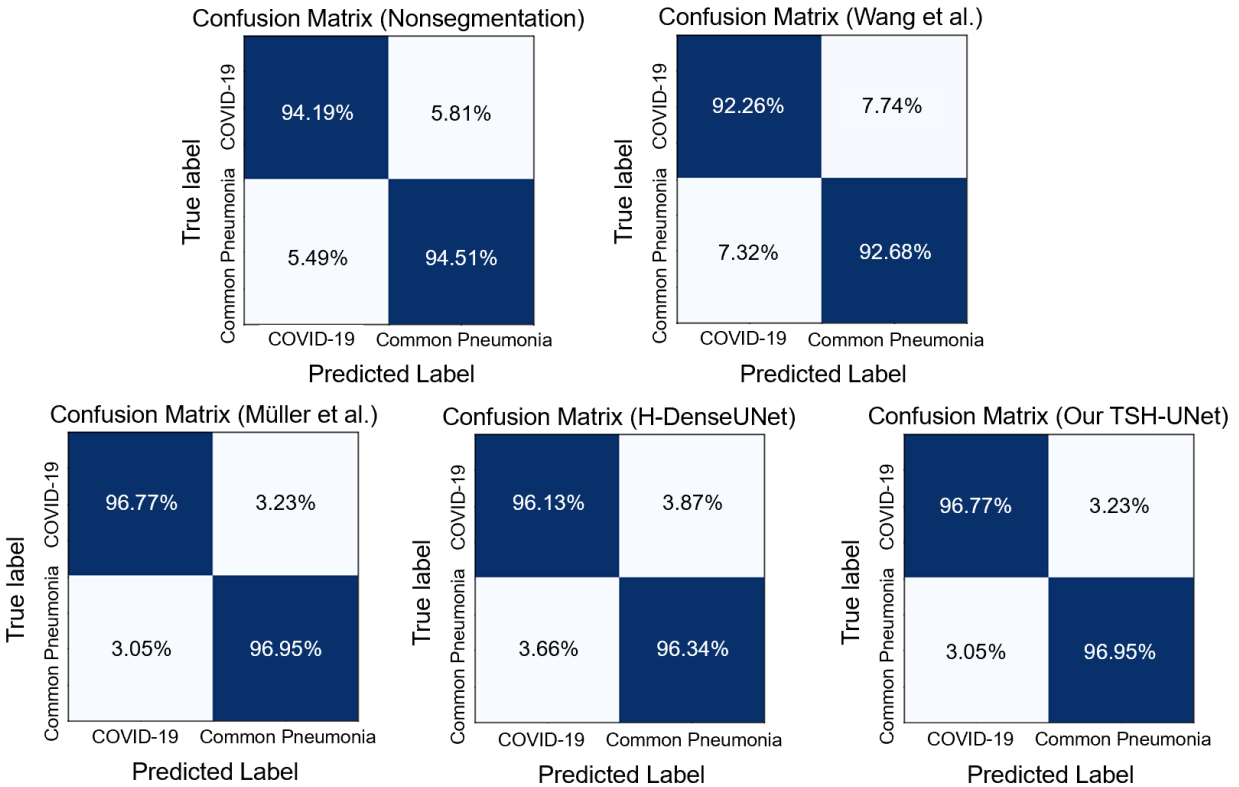

**Supplementary Fig. 4.** Confusion matrixes of classification tasks using the results of different segmentation networks on RHWU training dataset.

**Supplementary Table 1.** Architectures of the proposed TSH-UNet, consisting of the 2D network and 3D network

|                    | Input       | Output      | 2D Network                         | Input         | Output        | 3D Network                             |
|--------------------|-------------|-------------|------------------------------------|---------------|---------------|----------------------------------------|
| input              | 512×512×3   |             |                                    | 512×512×12×2  |               |                                        |
| convolution 1      | 512×512×3   | 256×256×96  | 7×7, 96 stride 2                   | 512×512×12×2  | 256×256×6×96  | 7×7×7, 96 stride 2                     |
| max pooling        | 256×256×96  | 128×128×96  | 3×3, stride 2                      | 256×256×6×96  | 128×128×3×96  | 3×3×3, stride 2                        |
| dense block 1      | 128×128×96  | 128×128×384 | [1×1, 192 conv<br>3×3, 48 conv]×6  | 128×128×3×96  | 128×128×3×192 | [1×1×1, 128 conv<br>3×3×3, 32 conv]×3  |
| transition layer 1 | 128×128×384 | 64×64×192   | 1×1 conv<br>2×2 aver pool          | 128×128×3×192 | 64×64×3×96    | 1×1×1 conv<br>2×2×1 aver pool          |
| dense block 2      | 64×64×192   | 64×64×768   | [1×1, 192 conv<br>3×3, 48 conv]×12 | 64×64×3×96    | 64×64×3×224   | [1×1×1, 128 conv<br>3×3×3, 32 conv]×4  |
| transition layer 2 | 64×64×768   | 32×32×384   | 1×1 conv<br>2×2 aver pool          | 64×64×3×224   | 32×32×3×112   | 1×1×1 conv<br>2×2×1 aver pool          |
| dense block 3      | 32×32×384   | 32×32×2112  | [1×1, 192 conv<br>3×3, 48 conv]×36 | 32×32×3×112   | 32×32×3×496   | [1×1×1, 128 conv<br>3×3×3, 32 conv]×12 |
| transition layer 3 | 32×32×2112  | 16×16×1056  | 1×1 conv<br>2×2 aver pool          | 32×32×3×496   | 16×16×3×248   | 1×1×1 conv<br>2×2×1 aver pool          |
| dense block 4      | 16×16×1056  | 16×16×2208  | [1×1, 192 conv<br>3×3, 48 conv]×24 | 16×16×3×248   | 16×16×3×504   | [1×1×1, 128 conv<br>3×3×3, 32 conv]×8  |
| upsampling layer1  | 16×16×2208  | 32×32×2208  | 2×2 upsample                       | 16×16×3×504   | 32×32×3×504   | 2×2×1 upsample                         |
|                    | --          | 32×32×2112  | sum with dense block 3             | --            | 32×32×3×496   | sum with dense block 3                 |
|                    | 32×32×2112  | 32×32×768   | 3×3 conv, 768                      | 32×32×3×496   | 32×32×3×504   | 3×3×3 conv, 504                        |
| upsampling layer2  | 32×32×768   | 64×64×768   | 2×2 upsample                       | 32×32×3×504   | 64×64×3×504   | 2×2×1 upsample                         |
|                    | --          | 64×64×768   | sum with dense block 2             | --            | 64×64×3×224   | sum with dense block 2                 |
|                    | 64×64×768   | 64×64×384   | 3×3 conv, 384                      | 64×64×3×224   | 64×64×3×224   | 3×3×3 conv, 224                        |
| upsampling layer3  | 64×64×384   | 128×128×384 | 2×2 upsample                       | 64×64×3×224   | 128×128×3×224 | 2×2×1 upsample                         |
|                    | --          | 128×128×384 | sum with dense block 1             | --            | 128×128×3×192 | sum with dense block 1                 |
|                    | 128×128×384 | 128×128×96  | 3×3 conv, 96                       | 128×128×3×192 | 128×128×3×192 | 3×3×3 conv, 192                        |
| upsampling layer4  | 128×128×96  | 256×256×96  | 2×2 upsample                       | 128×128×3×192 | 256×256×6×192 | 2×2×2 upsample                         |
|                    | --          | 256×256×96  | sum with conv 1                    | --            | 256×256×6×96  | sum with conv 1                        |
|                    | 256×256×96  | 256×256×96  | 3×3 conv, 96                       | 256×256×6×96  | 256×256×6×96  | 3×3×3 conv, 96                         |
| upsampling layer5  | 256×256×96  | 512×512×96  | 2×2 upsample                       | 256×256×6×96  | 512×512×12×96 | 2×2×2 upsample                         |
|                    | 512×512×96  | 512×512×64  | 3×3 conv, 64                       | 512×512×12×96 | 512×512×12×64 | 3×3×3 conv, 64                         |
| convolution 2      | 512×512×64  | 512×512×3   | 1×1 conv, 3                        | 512×512×12×64 | 512×512×12×3  | 1×1×1 conv, 3                          |
